# Supplementary material for: Clinically Interpretable Extracellular Vesicle Gene Model for Non-Invasive Liver Cancer Diagnosis
Source: Research Square preprint supplement (doi:10.21203/rs.3.rs-8217267/v1), 2025-12-19
Supplement: Supplementary file 1 [file ee7ce8bf73cdca6156bc5b4c.docx]

**Supporting Information**

***for***

**Clinically Interpretable Extracellular Vesicle Gene Model for Non-Invasive Liver Cancer Diagnosis**

Yan Zhang1#, Zhengying Mo2#, Lei Zhang3#, Zhangming Zhou4#, Zhaohan Wei5, Yuan Zhu6, Yadong Wang6, Hu Wang7; Debing Xiang8, Jing Huang9*, Qingle Liang1*

1 Department of Clinical Laboratory Medicine, Chongqing University, Jiangjin Hospital, Chongqing, China.

2 Department of Oncology, Tai-He Hospital, Hubei University of Medicine, Shiyan, Hubei, China.

3 Department of Clinical Laboratory, Chongqing Health Center for Women and Children, Chongqing, China; Department of Clinical Laboratory, Women and Children’s Hospital of Chongqing Medical University, Chongqing, China; NHC Key Laboratory of Birth Defects and Reproductive Health，Chongqing, China.

4 Department of Neurosurgery, Dujiangyan Medical Center, Chengdu, China.5. Marshall Laboratory of Biomedical Engineering, International Cancer Center, Laboratory of Evolutionary Theranostics (LET), School of Biomedical Engineering, Shenzhen University Medical School, Shenzhen University, Shenzhen, Guangdong, China.6 Lun Lun Research Institute of AI FOR SCIENCE, Beijing Diji Technology Co., Ltd., Beijing, China.

7 Clinical Laboratory of Jingzhou Third People's Hospital, Jingzhou, Hubei, China.8 Department of Oncology, Chongqing University Jiangjin Hospital, Chongqing, China.9 Pediatrics Department, Chongqing University Jiangjin Hospital, Chongqing, China. * Corresponding authors. Address: No. 725, Jiangzhou Avenue, Dingshan Subdistrict, Jiangjin District, Chongqing, China 86 (023)47518891 E-mail addresses: 157265743@qq.com (Jing Huang), liangqingle@126.com (Qing-le Liang).

# These authors are contributed equally to this work.

**Supplementary Figures and Tables**

**Supplementary Figure 1**


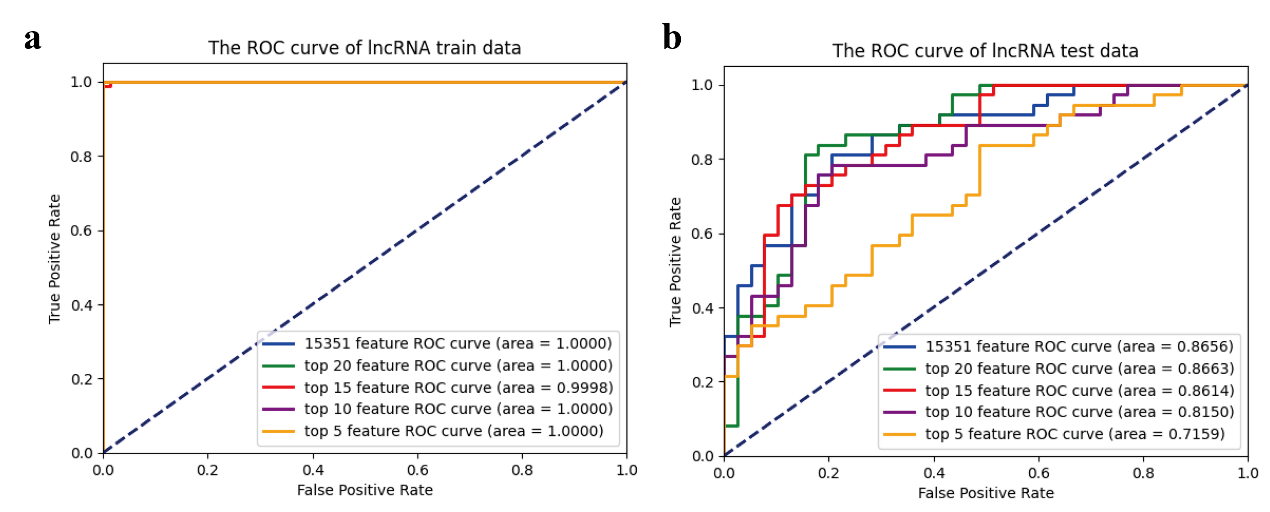


**Supplementary Figure 1.** ROC curves of HCC diagnostic model with lncRNAs signatures (a) training set (b) test set.

**Supplementary Figure 2**


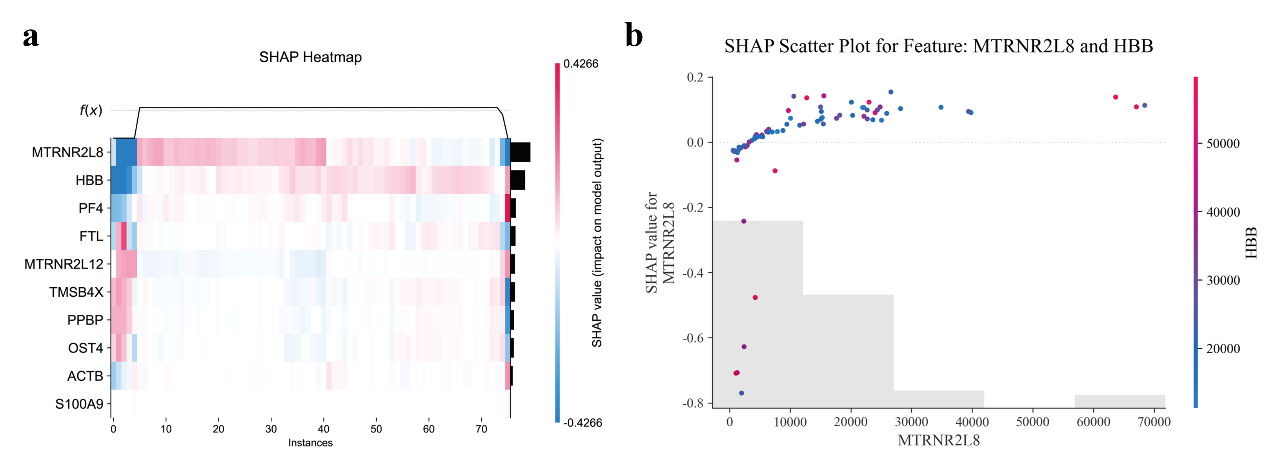


**Supplementary Figure 2.** SHAP global interpretation (a) SHAP heatmap (b) scatter plot for MTRNR2L8 and HBB.

**Supplementary Figure 3**


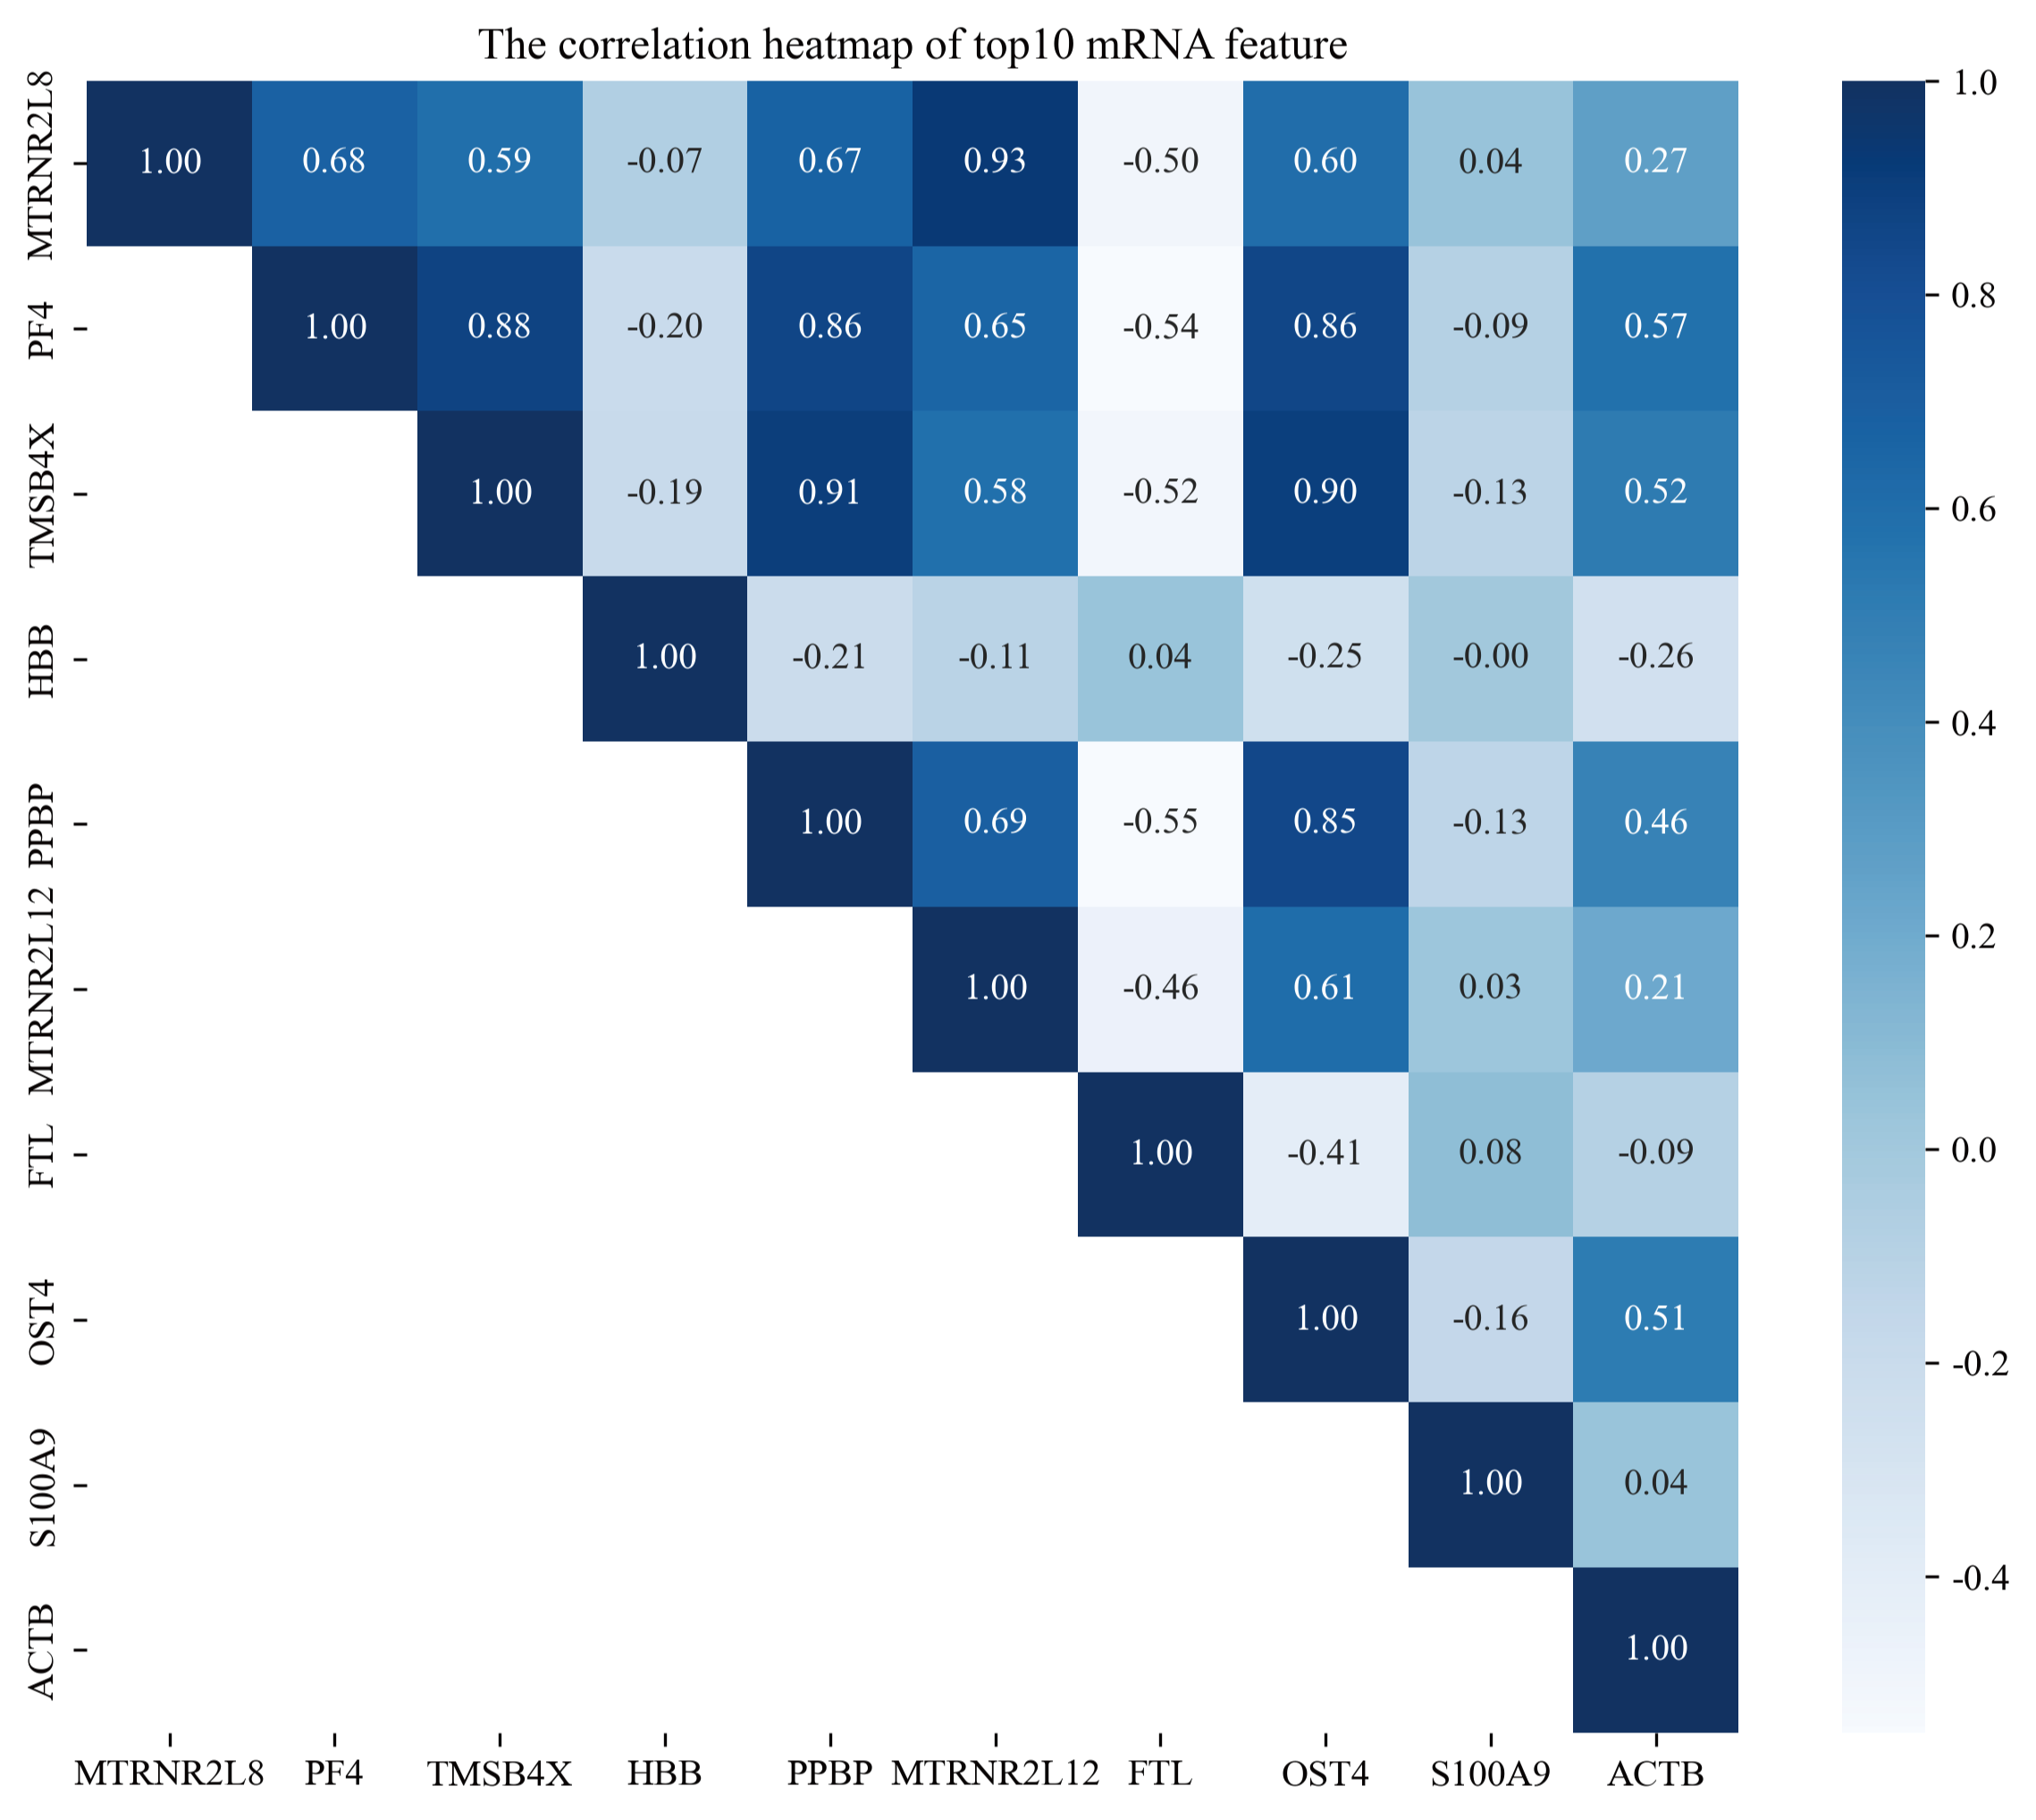


**Supplementary Figure 3.** The correlation heatmap of top 10 mRNA features.

**Supplementary Figure 4**


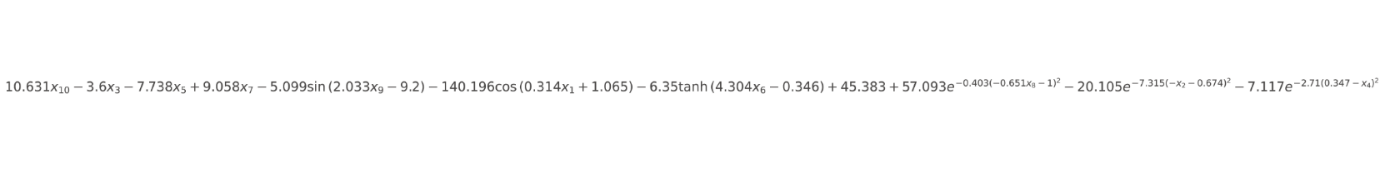


**Supplementary Figure 4.** The functional expression formula of the KAN model.

**Supplementary Table 1. Model Comparisons based on mRNA signatures.**

|  | Accuracy | Precision | Recall | F1-Score | AUC |
| --- | --- | --- | --- | --- | --- |
| Logistic Regression | 0.7895 | 0.7442 | 0.8649 | 0.8000 | 0.8725 |
| Random Forest | 0.8684 | 0.9355 | 0.7838 | 0.8529 | 0.9210 |
| SVM | 0.8289 | 0.8529 | 0.7838 | 0.8169 | 0.8870 |
| XGBoost | 0.8553 | 0.9062 | 0.7838 | 0.8406 | 0.9155 |
| Decision Tree | 0.7500 | 0.7647 | 0.7027 | 0.7324 | 0.7488 |
| Deep Neural Network | 0.8816 | 0.9375 | 0.8108 | 0.8696 | 0.9324 |

**Supplementary Table 2. Model Comparisons based on lncRNA signatures.**

|  | Accuracy | Precision | Recall | F1-Score | AUC |
| --- | --- | --- | --- | --- | --- |
| Logistic Regression | 0.5132 | 0.5000 | 0.8919 | 0.6408 | 0.5295 |
| Random Forest | 0.7763 | 0.8125 | 0.7027 | 0.7536 | 0.8326 |
| SVM | 0.6053 | 1.0000 | 0.1892 | 0.3182 | 0.7290 |
| XGBoost | 0.7632 | 0.7879 | 0.7027 | 0.7429 | 0.8898 |
| Decision Tree | 0.6316 | 0.6286 | 0.5946 | 0.6111 | 0.6306 |
| Deep Neural Network | 0.7500 | 0.6875 | 0.8919 | 0.7765 | 0.8656 |

|  | AUC | | Precision | | Recall | | F1-score | |
| --- | --- | --- | --- | --- | --- | --- | --- | --- |
|  | mRNA | lncRNA | mRNA | lncRNA | mRNA | lncRNA | mRNA | lncRNA |
| Top All | 0.9324 | 0.8556 | 0.8879 | 0.7746 | 0.8816 | 0.7500 | 0.8809 | 0.7457 |
| Top 20 | 0.9279 | 0.8663 | 0.8671 | 0.8158 | 0.8553 | 0.8158 | 0.8537 | 0.8158 |
| Top15 | 0.9089 | 0.8614 | 0.8188 | 0.7642 | 0.8158 | 0.7632 | 0.8150 | 0.7632 |
| Top 10 | 0.8877 | 0.8150 | 0.8124 | 0.7000 | 0.8026 | 0.6842 | 0.8004 | 0.6798 |
| Top 5 | 0.8628 | 0.7159 | 0.7634 | 0.6184 | 0.7500 | 0.6184 | 0.7456 | 0.6174 |

**Supplementary Table 3. Model performance with different features.**
